# Supplementary material
Source: PubMed Central journal article supplement (PMC4749510)
Supplement: NIHMS620008-supplement-2.pdf [file NIHMS620008-supplement-2.pdf]

## **Legends for supplemental videos**

### **Video 1-3: Effects of pitavastatin in DM mice**

STZ-induced DM mice were orally administrated pitavastatin or vehicle as described in Fig.5.

Leukocyte rolling was recorded with a digital camera for 2 min. Video 1, Control, Video 2, DM with vehicle treatment, Video 3, DM with pitavastatin treatment.

### **Video 4-7: Effects of pitavastatin in inducible ERK5-EKO mice**

Inducible ERK5-EKO mice were injected with 4-OHT for 2 weeks and then were orally administrated pitavastatin or vehicle as described in Fig.5. Leukocyte rolling was recorded with a digital camera for 2 min.

Video 4, Peanut Oil (PO) treated ERK5-EKO (no induction of endothelial ERK5 deletion) with vehicle treatment; Video 5, PO treated ERK5-EKO with pitavastatin treatment; Video 6, 4-OHT treated ERK5-EKO (induction of endothelial ERK5 deletion) with vehicle treatment; Video 7, 4-OHT treated ERK5-EKO (induction of endothelial ERK5 deletion) with pitavastatin treatment.
